# Supplementary material for: Intramolecular communication and electrochemical observation of the 17-electron ruthenocenium cation in fluorinated ruthenocene-containing β-diketones; polymorphism of C10H21 and C10F21 derivatives
Source: Royal Society of Chemistry journal article supplement (doi:10.1039/c3nj00354j), 2013-01-01
Supplement: c3nj00354j.pdf [file c3nj00354j.pdf]

## Electronic Supplementary Information for

# Intramolecular communication and electrochemical observation of the 17-electron ruthenocenium cation in fluorinated ruthenocene-containing $\beta$ -diketones; polymorphism of $C_{10}H_{21}$ and $C_{10}F_{21}$ derivatives

Elizabeth Erasmus and Jannie C. Swarts\*

*Supplementary information for paragraph 3.4. Keto-enol Isomerisation Kinetics*

In principle two enol isomers can exist in equilibrium ( $Rc-C(OH)-CH-CO-R \rightleftharpoons Rc-CO-CH-C(OH)-R$ ). However, in practice only one set of enol tautomer signals is observed on the NMR. This implies that either the conversion from one enol tautomer to the other is fast on the NMR time scale, or that only one tautomer exist. Either way, upon interpreting NMR spectra of the enol tautomers, the measured integral values of the enol tautomers would be indicative of the total enol tautomers content in solution.

A comparison of the rates of isomerisation in  $CD_3CN$ , (Table 2 main text), shows that the long chain alkyl R-group  $C_{10}H_{21}$  (**4**) isomerises the slowest and that the two new  $\beta$ -diketones having fluorinated R-groups  $C_{10}F_{21}$  (**1**) and  $C_6F_5$  (**3**) isomerises slightly faster than the  $CF_3$  (**2**). In both solvents compound **4** with  $R = C_{10}H_{21}$  isomerised the slowest and **7** with  $R =$  ruthenocetyl isomerised the fastest. However, the ratio between the slowest and the fastest half-lives is for  $CDCl_3$   $49856/220 = 226$  but for  $CD_3CN$  it is only  $18381/4620 = 4$ ; this is a difference of two orders of magnitude.

Assessing the data of **1-8** in Table 2 (main text) in both CD<sub>3</sub>CN and CDCl<sub>3</sub> revealed that the enol isomer is more abundant for **2, 3, 4** and **7** in CD<sub>3</sub>CN than in CDCl<sub>3</sub>, but for **1, 5, 6** and **8** the keto isomer is most abundant at equilibrium. With the exception of **2** and **4** the equilibrium constants, K<sub>c</sub>, and the k<sub>obs</sub> rate constants are larger in CDCl<sub>3</sub> than in CD<sub>3</sub>CN.

*Supplementary information for paragraph 3.5, Electrochemistry*

Equation 8 was determined to estimate the redox properties of the R<sub>c</sub> group in ruthenocene-containing β-diketones.

$$E_{\text{pa}} = 270.91\chi_{\text{R}} + 228.2; R^2 = 0.8964 \quad (8)$$

Ideally one would prefer to relate the formal oxidation potential  $E^{\circ} = (E_{\text{pa}} + E_{\text{pc}})/2$  with  $\chi_{\text{R}}$  because  $E^{\circ}$  is a thermodynamic quantity while  $E_{\text{pa}}$  is not. However, because wave 3 corresponding to  $E_{\text{pc}}$  were not detected for all compounds in the compound series **1 – 8**, a relationship based on  $E^{\circ}$  could not be established.
